# Supplementary material for: A New Dinoflagellate Genome Illuminates a Conserved Gene Cluster Involved in Sunscreen Biosynthesis
Source: PubMed Central journal article supplement (PMC7875005; doi:10.1093/gbe/evaa235), 2020-11-04
Supplement: evaa235_supplementary_data.pdf [file evaa235_supplementary_data.pdf]

## Supplementary Table S1

Summary of Illumina data used for assembling the genome and transcriptomes of *Durisdinium trenchii*

| Nucleic acid types | Methods, library*                | Total             |                              |                     |
|--------------------|----------------------------------|-------------------|------------------------------|---------------------|
|                    |                                  | sequences<br>(Gb) | Number of<br>reads (million) | Read<br>length (bp) |
| DNA                | Illumina Hiseq, 500-600 bp PE    | 74.88             | 777.21                       | 2 x 101             |
| DNA                | Illumina Hiseq, 1.5-2.0 kbp MP   | 0.92              | 10.82                        | 2 x 101             |
| DNA                | Illumina Hiseq, 12.0-19.0 kbp MP | 0.12              | 1.47                         | 2 x 101             |
| RNA                | Illumina Hiseq, ~200 bp PE       | 11.20             | 85.04                        | 2 x 134             |

\*PE: Paired End; MP: Mate Pair

## Supplementary Table S2

Putative bacterial sequences in an initial assembly of the *Durisdinium trenchii* genome

| Scaffold  | Length  | GC%     |
|-----------|---------|---------|
| sc0000001 | 3818788 | 55.4467 |
| sc0000003 | 3374619 | 68.7074 |
| sc0000005 | 2905589 | 58.1473 |
| sc0000006 | 1941893 | 58.9728 |
| sc0000007 | 1845437 | 59.2217 |
| sc0000008 | 1650576 | 59.1353 |
| sc0000010 | 1160861 | 61.6839 |
| sc0000011 | 1072958 | 59.8257 |
| sc0000012 | 994447  | 62.0804 |
| sc0000014 | 829373  | 62.1216 |
| sc0000015 | 780951  | 59.2596 |
| sc0000016 | 701201  | 58.6964 |
| sc0000018 | 635352  | 59.8572 |
| sc0000034 | 446913  | 61.623  |

|           |        |         |
|-----------|--------|---------|
| sc0000036 | 442620 | 58.428  |
| sc0000077 | 341569 | 60.8129 |
| sc0000219 | 256152 | 61.0548 |
| sc0000408 | 207333 | 60.8107 |
| sc0000623 | 180561 | 60.4769 |
| sc0000774 | 162685 | 58.8038 |
| sc0000789 | 162869 | 59.1904 |
| sc0000905 | 153482 | 59.4388 |
| sc0001436 | 119183 | 57.8482 |
| sc0001971 | 97912  | 58.8812 |
| sc0002081 | 95206  | 61.7364 |
| sc0004185 | 51425  | 59.1347 |
| sc0006929 | 23952  | 61.7443 |
| sc0007229 | 21979  | 56.3267 |
| sc0007438 | 20711  | 60.2916 |
| sc0009319 | 11254  | 63.2664 |
| sc0009346 | 11246  | 55.182  |
| sc0009517 | 10603  | 60.4357 |
| sc0009620 | 10291  | 55.1335 |

---

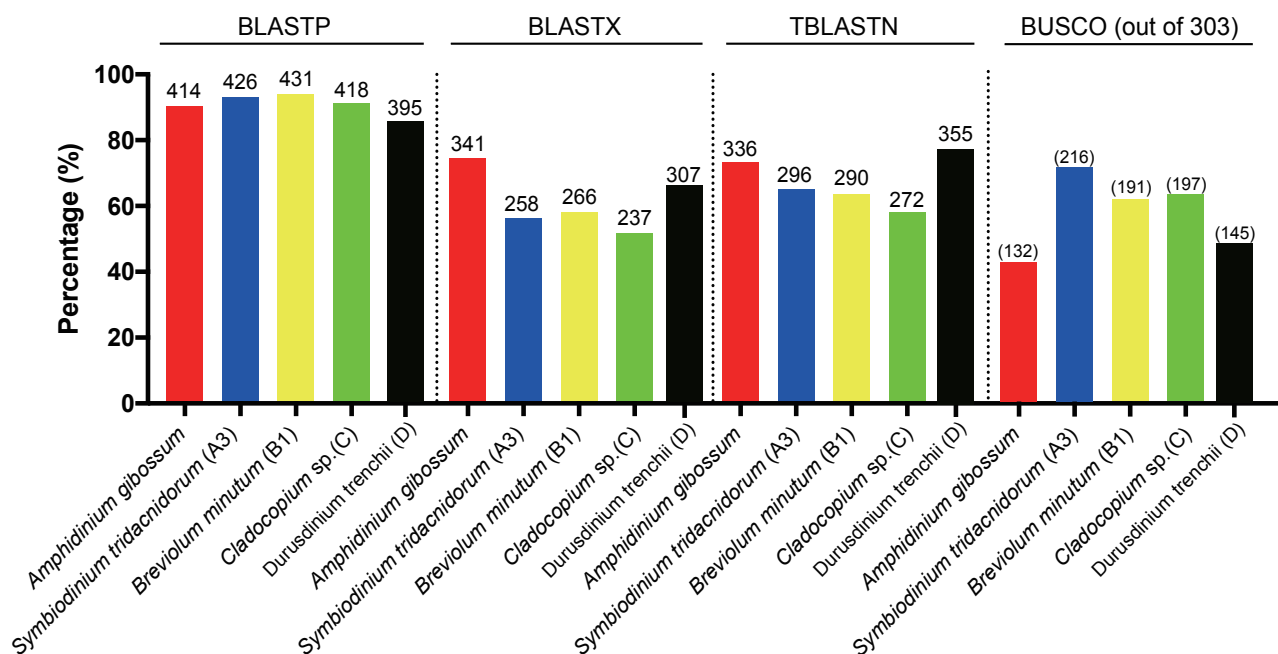

### Supplementary Fig. S1.

CEGMA and BUSCO scores for the *Durusdinium trenchii* (clade D) genome and other available genomes of dinoflagellates. Recoveries of 458 CEGMA genes, based on several BLAST analyses using BLASTP (for predicted proteins) and on BLASTX and TBLASTN (for genome scaffolds), are shown (Beedessee et al. 2020). Recoveries of 303 BUSCO genes using protein mode and the Eukaryota\_odb9 dataset are compared. Numbers in brackets represent recovered BUSCOs gene numbers.

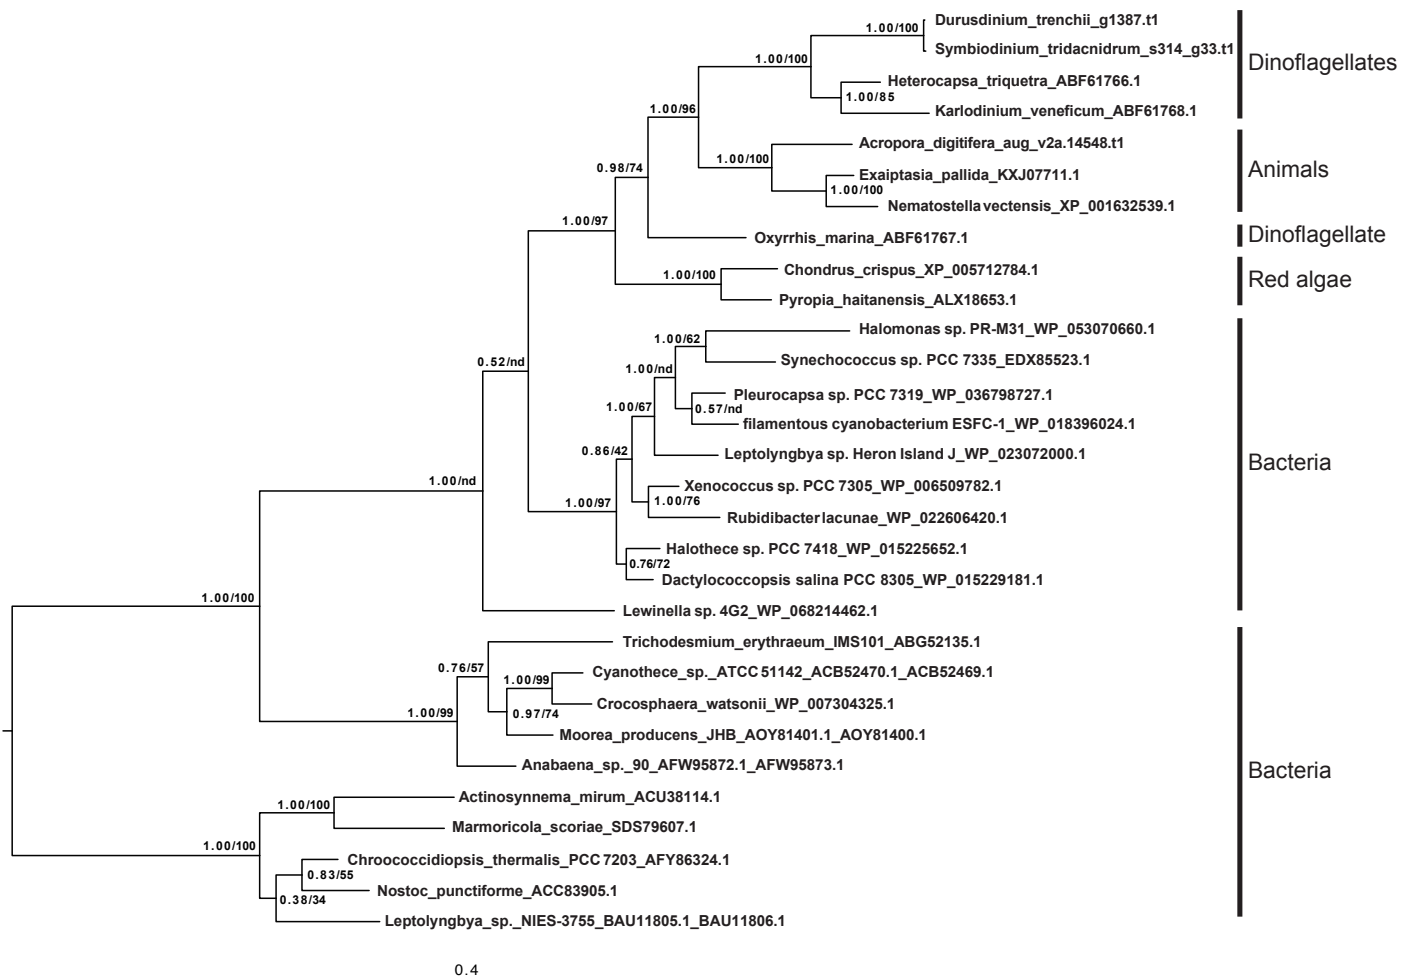

**Supplementary Fig. S2.**

A molecular phylogenetic tree of the DDG (dimethyl 4-deoxygadusol synthase) family by Bayesian inference and maximum likelihood. Posterior probabilities (MrBayes) and bootstrap values (LG+G model and RAxML) are shown at nodes. Some values were not determined by different topologies (nd).
